# Supplementary material for: Insights From the Ventricular Fibrillation Waveform Into the Mechanism of Survival Benefit From Bystander Cardiopulmonary Resuscitation
Source: PubMed Central journal article supplement — J Am Heart Assoc. 2021 Sep 25;10(19):e020825. doi: 10.1161/JAHA.121.020825 (PMC8649127; doi:10.1161/jaha.121.020825), 2021-09-25
Supplement: JAH3-10-e020825-s001.pdf [file JAH3-10-e020825-s001.pdf]

# **SUPPLEMENTAL MATERIAL**

**Table S1. Characteristics of study cohort and excluded cases**

|                                                               | Study cohort   | Excluded cases | P value |
|---------------------------------------------------------------|----------------|----------------|---------|
| Total Cases, n                                                | 1072           | 644            |         |
| Patient Characteristics                                       |                |                |         |
| Female, n (%)                                                 | 225 (21)       | 152 (24)       | 0.21    |
| Age, median (IQR)                                             | 62 (52, 72)    | 64 (54, 75)    | 0.02    |
| Cardiac etiology, n (%)                                       | 1023 (95)      | 571 (89)       | < 0.01  |
| Public Location, n (%)                                        | 370 (35)       | 206 (32)       | 0.29    |
| Bystander CPR, n (%)                                          | 814 (76)       | 472 (73)       | 0.23    |
| Resuscitation Process Variables                               |                |                |         |
| EMS Response Time, min, median (IQR)                          | 5.1 (4.0, 6.4) | 5.0 (3, 6.7)   | 0.49    |
| Interval between device power to ECG segment, s, median (IQR) | 37 (20-60)     |                |         |
| Shocks delivered, median (IQR)                                | 3 (1,6)        | 3 (1, 5)       | 0.09    |
| Outcomes                                                      |                |                |         |
| Sustained ROSC                                                | 799 (75)       | 428 (66)       | < 0.01  |
| Admit to hospital, n (%)                                      | 788 (74)       | 404 (63)       | 0.02    |
| Survive to hospital discharge, n (%)                          | 535 (50)       | 253 (39)       | 0.01    |
| Neurologically intact survival (CPC 1 or 2), n (%)*           | 488 (46)       | 223 (35)       | < 0.01  |

\* Cerebral Performance Category (CPC) was missing for 5 patients in the study cohort.

**Table S2. Adjusted associations between Utstein elements and VF waveform measures.** VF waveform measures were log-transformed and standardized. 95% CI in parentheses.

| Utstein element            | VF waveform measure     |                         |                         |
|----------------------------|-------------------------|-------------------------|-------------------------|
|                            | AMSA                    | Peak Frequency          | Median Peak Amplitude   |
| Bystander CPR              | 0.40 (0.26, 0.53)       | 0.25 (0.11, 0.38)       | 0.32 (0.19, 0.46)       |
| Female                     | 0.13 (-0.016, 0.27)     | 0.24 (0.097, 0.39)      | 0.093 (-0.053, 0.24)    |
| Public v. private location | 0.19 (0.06, 0.31)       | 0.13 (0.004, 0.26)      | 0.16 (0.031, 0.29)      |
| Cardiac                    | 0.26 (-0.028, 0.54)     | 0.30 (-0.018, 0.59)     | 0.038 (-0.25, 0.32)     |
| Age/10                     | -0.056 (-0.096, -0.015) | -0.063 (-0.10, -0.022)  | -0.030 (-0.071, 0.012)  |
| EMS response time          | -0.034 (-0.062, -0.010) | -0.040 (-0.068, -0.012) | -0.041 (-0.070, -0.013) |

AMSA = Amplitude Spectrum Area

**Table S3. Adjusted and unadjusted odds ratios for predicting survival to hospital discharge with bystander CPR stratified as telephone CPR and unassisted CPR.** The Utstein Model includes bystander CPR, sex, location, etiology, age, and EMS response time as predictor variables. The Mediation Models includes the Utstein variables plus a single VF measure. VF waveform measures were log-transformed and standardized. 95% CI in parentheses.

|                                            | Unadjusted       | Utstein Model    | Mediation Models |                  |                       |
|--------------------------------------------|------------------|------------------|------------------|------------------|-----------------------|
|                                            |                  |                  | AMSA             | Peak Frequency   | Median Peak Amplitude |
| Utstein Elements                           |                  |                  |                  |                  |                       |
| Telephone CPR vs. no CPR                   | 1.5 (1.1-2.1)    | 1.8 (1.3-2.5)    | 1.4 (0.98-2.0)   | 1.6 (1.1-2.2)    | 1.6 (1.1-2.2)         |
| Unassisted CPR vs. no CPR                  | 1.4 (1.0-1.9)    | 1.3 (0.89-1.8)   | 1.1 (0.75-1.6)   | 1.2 (0.82-1.7)   | 1.2 (0.82-1.7)        |
| Female                                     | 1.4 (1.0-1.9)    | 1.4 (1.0-1.9)    | 1.3 (0.96-1.9)   | 1.2 (0.89-1.7)   | 1.4 (0.99-1.9)        |
| Public v. private                          | 1.4 (1.0-1.8)    | 1.2 (0.88-1.6)   | 1.0 (0.74-1.4)   | 1.1 (0.79-1.4)   | 1.1 (0.80-1.4)        |
| Cardiac                                    | 1.8 (0.94-3.4)   | 2.8 (1.5-5.4)    | 2.7 (1.4-5.3)    | 2.5 (1.3-5.0)    | 2.9 (1.5-5.7)         |
| Age/10                                     | 0.71 (0.65-0.78) | 0.69 (0.62-0.75) | 0.69 (0.62-0.76) | 0.69 (0.62-0.76) | 0.68 (0.61-0.75)      |
| EMS response time                          | 0.85 (0.79-0.90) | 0.83 (0.78-0.89) | 0.84 (0.79-0.90) | 0.85 (0.79-0.90) | 0.84 (0.79-0.90)      |
| Ventricular fibrillation waveform measures |                  |                  |                  |                  |                       |
| AMSA                                       | 2.0 (1.7-2.3)    |                  | 1.9 (1.7-2.2)    |                  |                       |
| Peak Frequency                             | 2.0 (1.7-2.3)    |                  |                  | 1.8 (1.6-2.1)    |                       |
| Mean Peak Amplitude                        | 1.6 (1.4-1.8)    |                  |                  |                  | 1.5 (1.3-1.7)         |

AMSA = Amplitude Spectrum Area
